# Supplementary material for: Development of Selective Axonopathy in Adult Sensory Neurons Isolated From Diabetic Rats
Source: Oxford University Press journal article supplement (doi:10.2337/db09-0034), 2009-02-27
Supplement: db09-00341_suppl.doc [file db09-00341_suppl.doc]

**Supplementary data**

**FIG. 1.** (Supplementary data). High glucose concentration does not alter ROS and 4-HNE adducts levels in perikarya or axons in cultures of adult DRG sensory neurons. In (A) is shown quantification of ROS levels in neuronal perikarya after 24 hr in culture using CM-H2DCFDA. Neurons were grown in defined F12+N2 medium +/- 25 mmol/l D-glucose. Values are means + SEM, n = 193-223 neurons. (B) Quantification of ROS accumulation in axons after 24 hr in culture. Values are means + SEM, n = 74-127 axons. (C) Level of 4-HNE adducts in neuronal perikarya after 4 days in culture with and without 25 mmol/l D-glucose. Values are means + SEM, n = 210-211 neurons. (D) Number of 4-HNE positive puncta per 100µm of axon. Values are means + SEM, n = 3 replicate cultures.


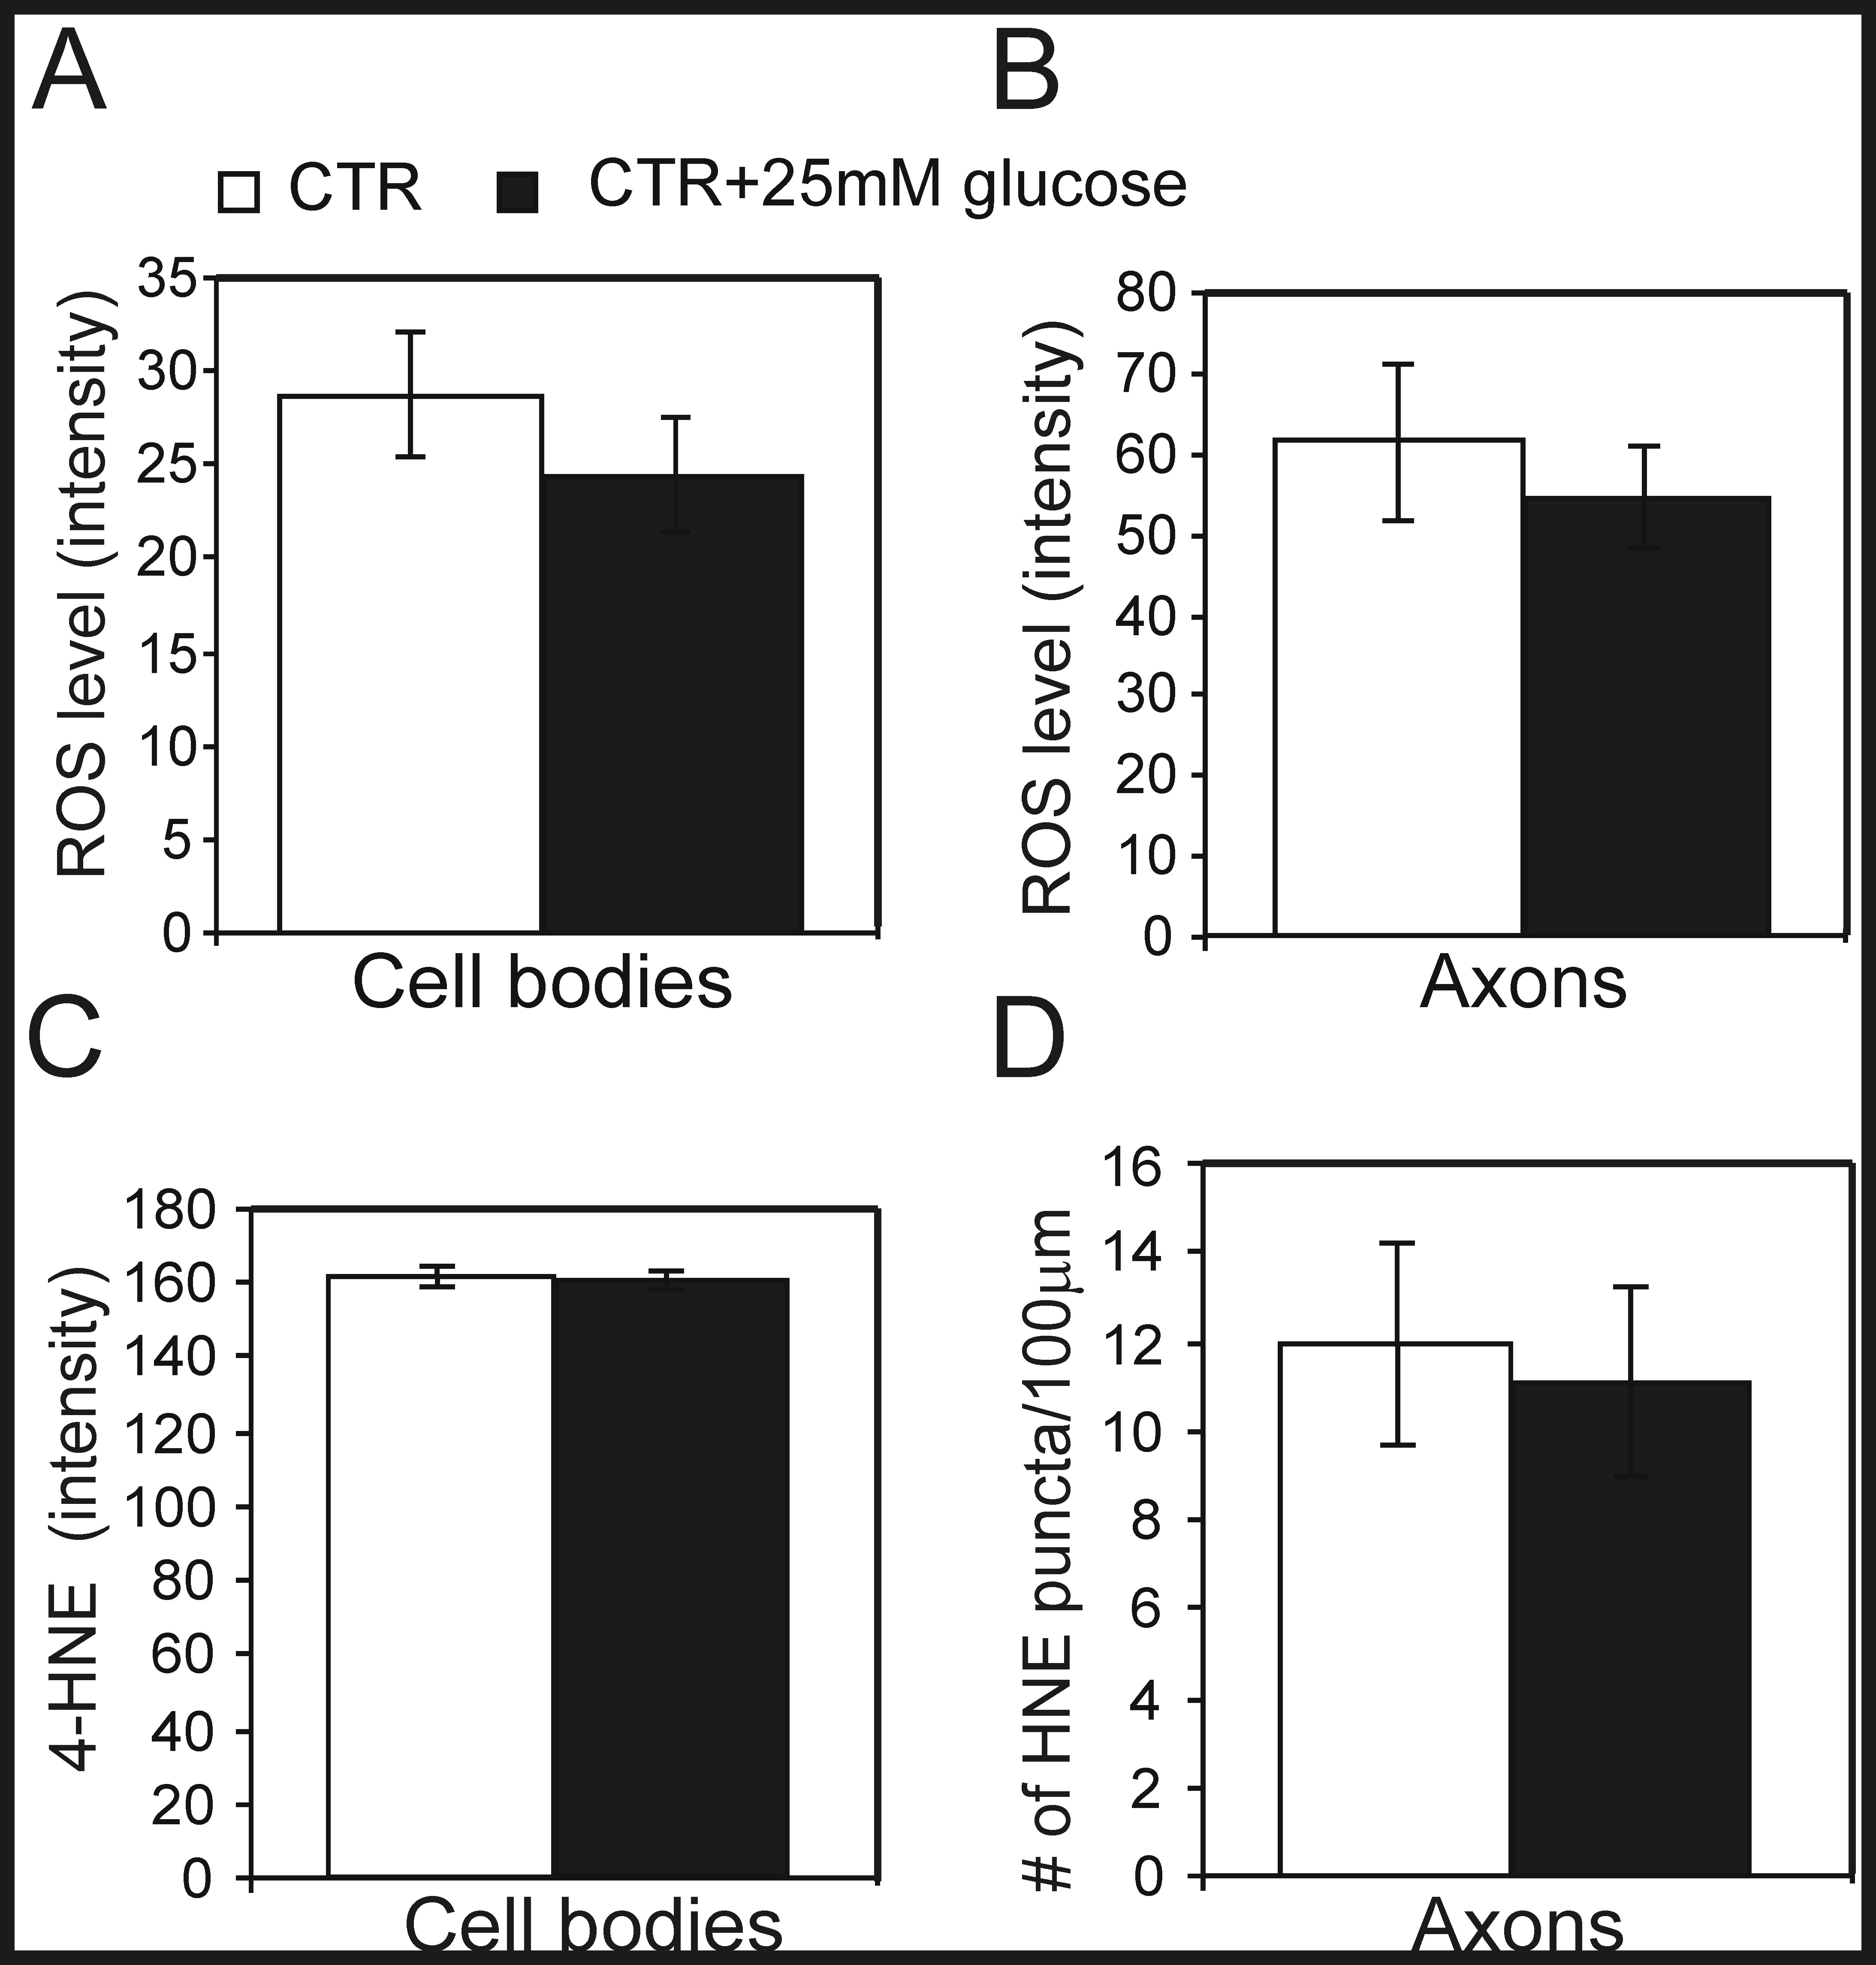


**Table 1.** Animal data for 2 cohorts used in studies. Supplementary data.

|  | N value | Weight (g) | Blood glucose (mmol/l) | HbA1c (%) |
| --- | --- | --- | --- | --- |
| Cohort 1 |  |  |  |  |
| Control | 6 | 703 ± 49.8 * | 7.9 ± 0.47 ** | 4.43 ± 0.22 **** |
| Diabetic | 6 | 373.8 ± 43.4 | 28.57 ± 2.98 | 10.5 ± 0.66 |
| Diabetic + insulin | 4 | 441.5 ± 35.8 | 16.58 ± 12.47 *** | N.D. |
| Cohort 2 |  |  |  |  |
| Control | 6 | 835.8 ± 104.1 * | 8.68 ± 2.21 * | 4.98 ± 0.36 * |
| Diabetic | 6 | 403.2 ± 39.8 | 29.48 ± 2.41 | 11.16 ± 1.19 |
| Diabetic + insulin | 12 | 493.3 ± 50.4 ** | 20.23 ± 6.85 ** | 9.1 ± 0.65 ** |

All data in Figures 1-8 was derived from animals from both cohorts. Cohort 1 was maintained for 3-4 months. Cohort 2 was maintained for 5 months. The HbA1c data for insulin implant group in cohort 1 were irretrievably lost by the company providing the assay service (BIOSAFE Laboratories, Inc. went out of business suddenly without any prior notice, the paper test results were not returned). The other HbA1c values for both cohorts 1 and 2 were assayed by the Fernyhough laboratory (using the in-house Bayer A1cNow+ test kit). Please note that the non-fasted blood glucose levels in control animals were relatively high and may be suggestive of early signs of impaired glucose tolerance. This is not surprising given the age, weight and level of inactivity of these animals. Values are means ± SD. * P < 0.001 vs other groups; ** P < 0.001 vs diabetic; *** P < 0.05 vs diabetic (all by one-way ANOVA with Tukeys posthoc test); **** P < 0.0001 vs diabetic (Student’s t-Test).
